# Supplementary material
Source: PubMed Central journal article supplement (PMC2746827)
Supplement: NIHMS127428-supplement-supplement_1.pdf [file NIHMS127428-supplement-supplement_1.pdf]

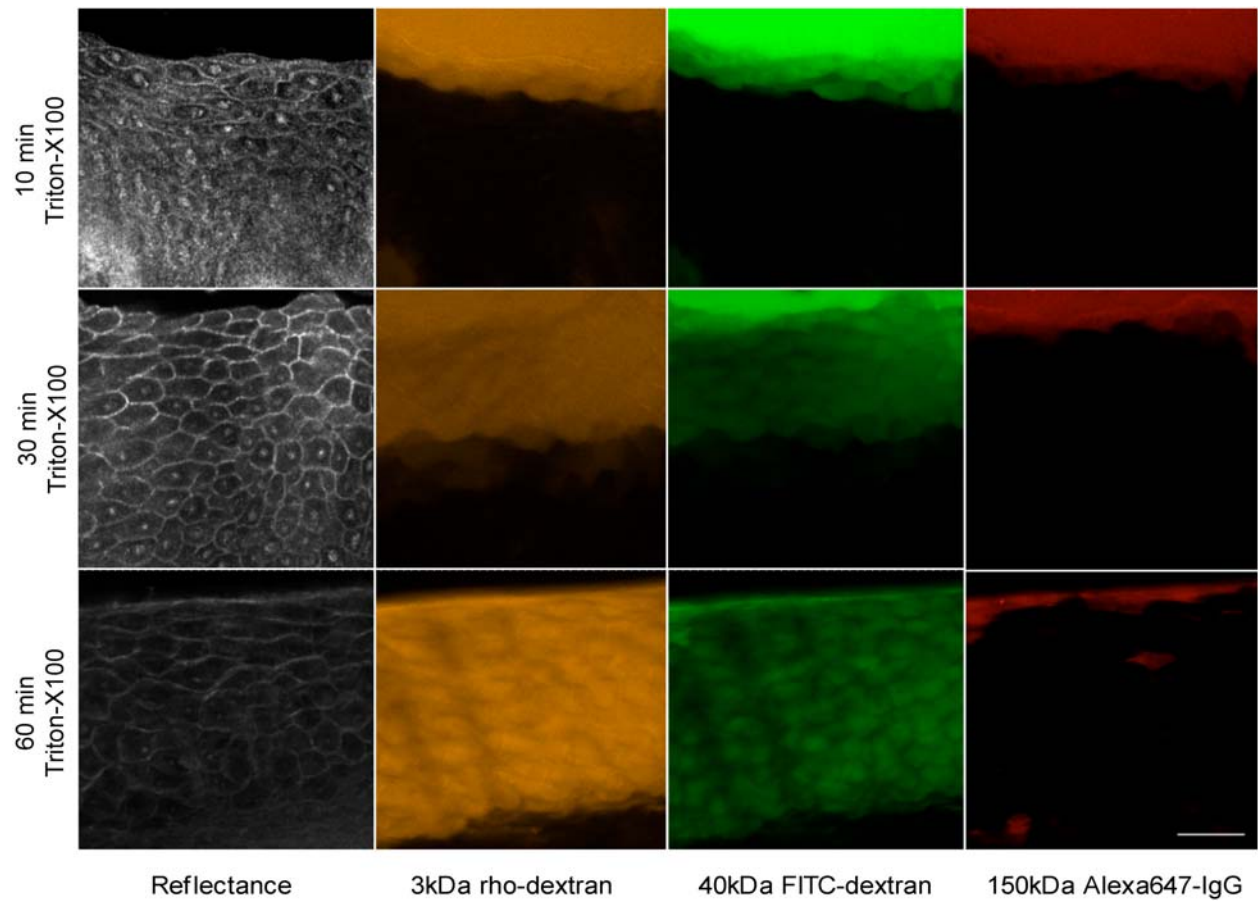

**Supplementary Fig. 1** Permeation of the porcine oral mucosa following treatment with 1% Triton-X100. Triton-X100 was topically applied to the top surface of fresh tissue biopsies for 0 to 60 minutes, then the tissue was sliced, probed with fluorescent molecules of three sizes, and imaged in cross-section. Representative confocal images, acquired 40 $\mu$ m below the cut surface, are shown for the 10, 30, and 60 minute time-points. Tissue permeation was characterized by a well-defined border that progressed deeper with time. The scale bar represents 100  $\mu$ m.
